# Supplementary figures and images for: The Klebsiella pneumoniae carbapenemase (KPC) β-Lactamase Has Evolved in Response to Ceftazidime Avibactam
Source: MDPI journal article supplement (doi:10.3390/antibiotics13010040), 2023-12-31

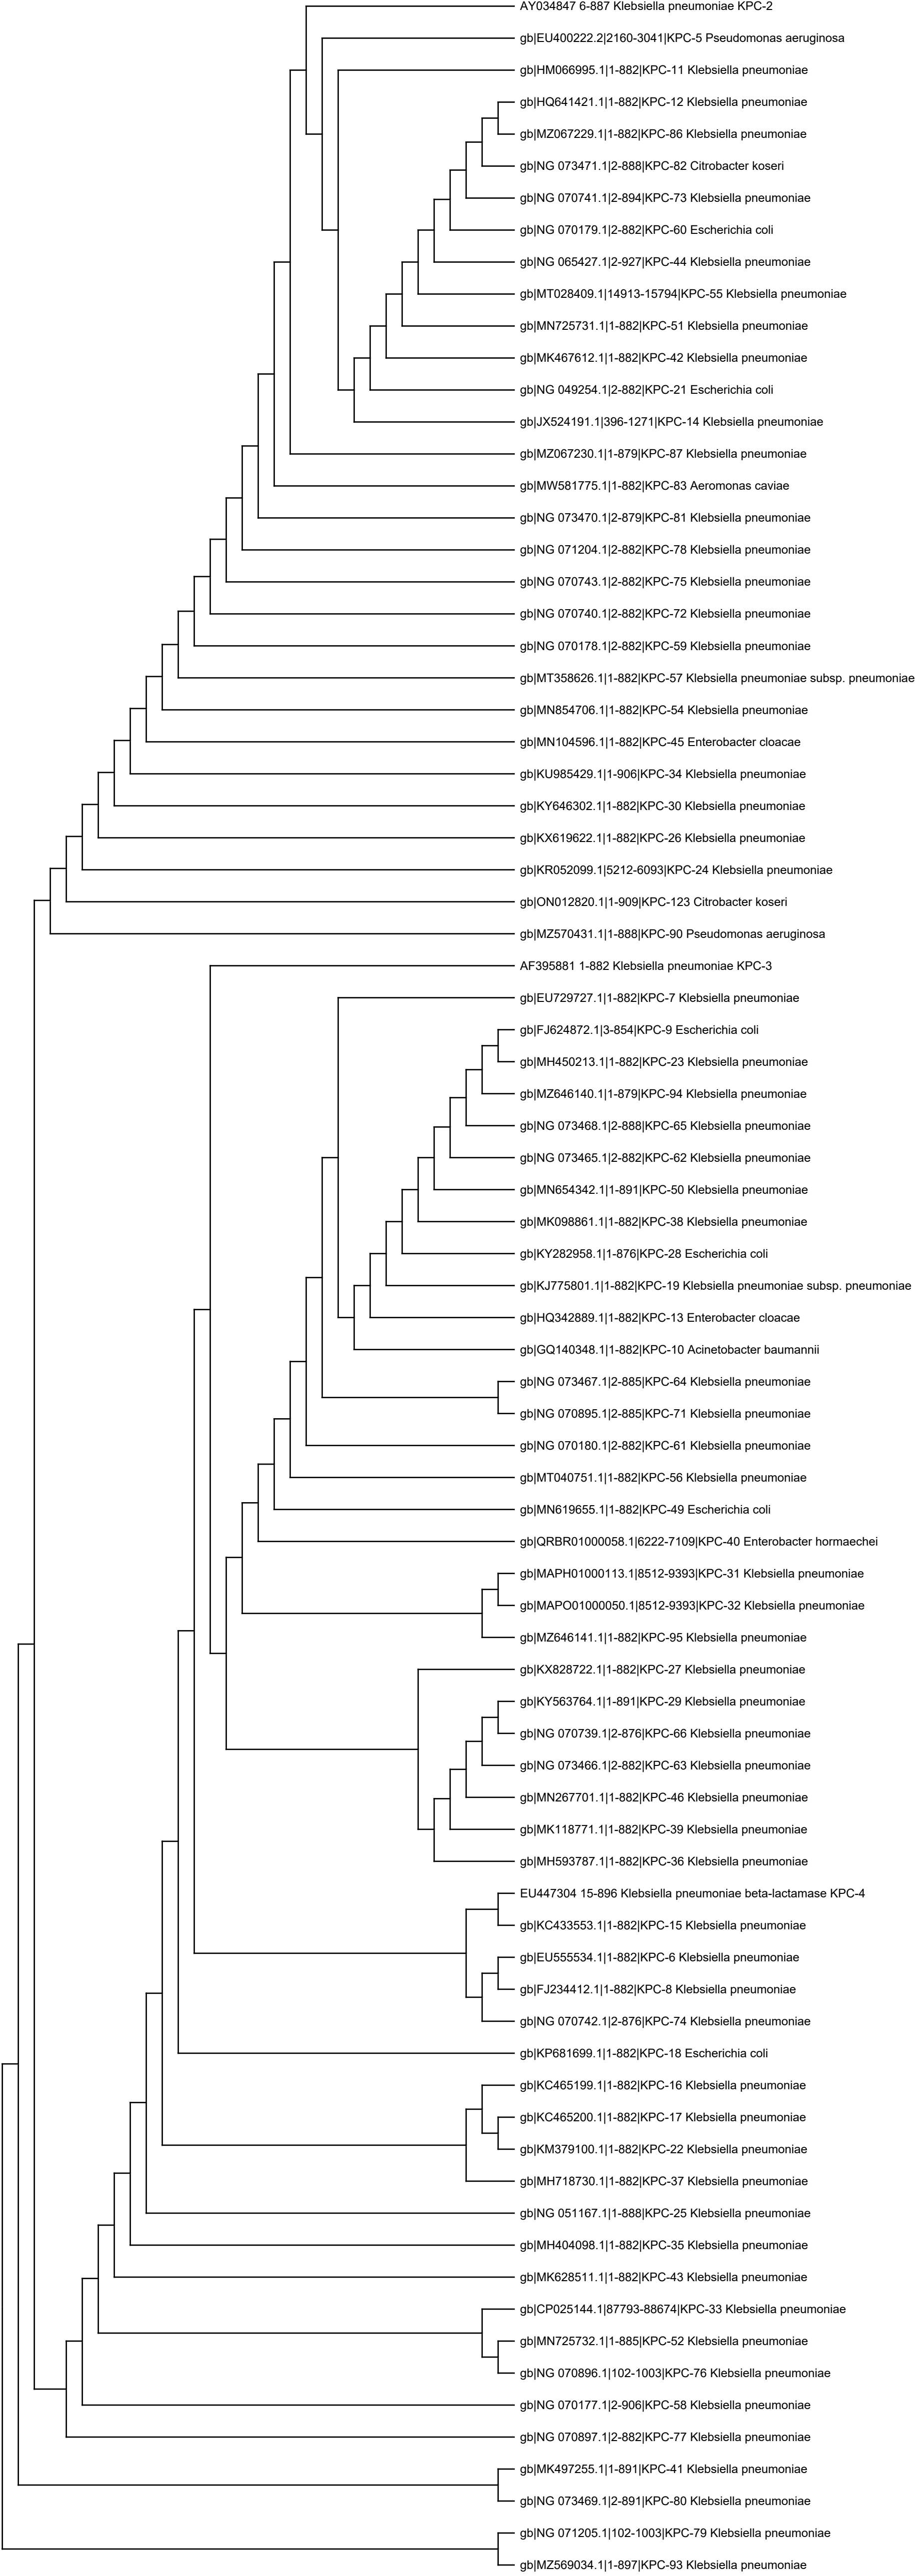

Supplement: s1 [file s1]

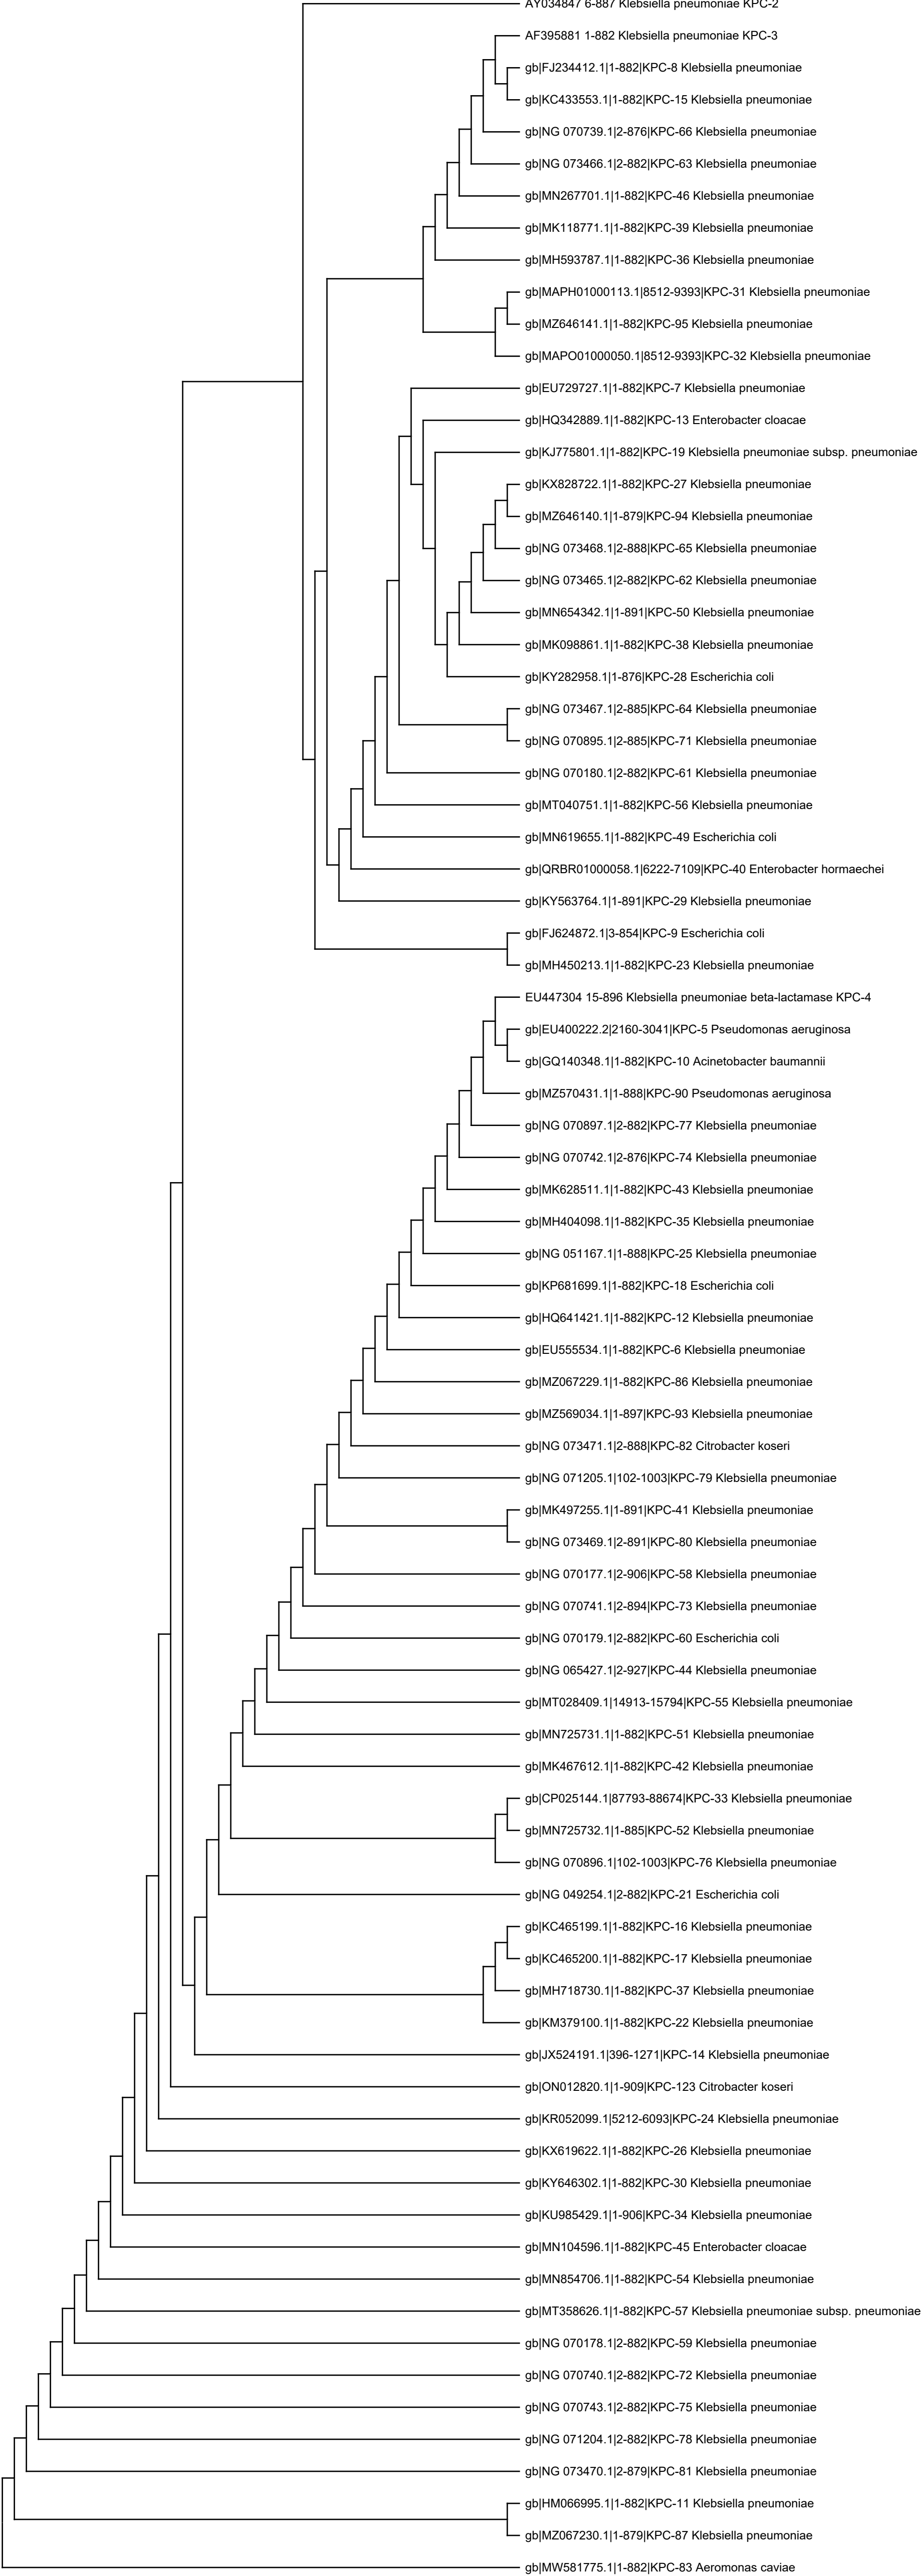

Supplement: s1 [file s1]
